# Cl<sup>-</sup> Is Required for HCO<sub>3</sub><sup>-</sup> Entry Necessary for Sperm Capacitation in Guinea Pig: Involvement of a Cl<sup>-</sup>/HCO<sub>3</sub><sup>-</sup> Exchanger (SLC26A3) and CFTR<sup>1</sup>

Wen Ying Chen,<sup>4,5</sup> Wen Ming Xu,<sup>5</sup> Zhang Hui Chen,<sup>4</sup> Ya Ni,<sup>4</sup> Yu Ying Yuan,<sup>4</sup> Si Chang Zhou,<sup>4</sup>  
Wen Wei Zhou,<sup>6</sup> Lai Ling Tsang,<sup>5</sup> Yiu Wa Chung,<sup>5</sup> Pia Höglund,<sup>7</sup> Hsiao Chang Chan,<sup>2,5</sup> and Qi Xian Shi<sup>3,4</sup>

Unit of Reproductive Physiology,<sup>4</sup> Institute of Reproductive Health, Zhejiang Academy of Medical Sciences, Hangzhou 310013, China

Department of Physiology,<sup>5</sup> Faculty of Medicine, Epithelial Cell Biology Research Center, Li Ka Shing Institute of Health Sciences, The Chinese University of Hong Kong, Shatin, Hong Kong

Experimental Animal Center of Zhejiang Province,<sup>6</sup> Hangzhou 310013, China

Hospital for Children and Adolescents,<sup>7</sup> Department of Medical Genetics, University of Helsinki, FI-00014 Helsinki, Finland

## ABSTRACT

Our previous study demonstrated the involvement of cystic fibrosis transmembrane conductance regulator (CFTR) in transporting bicarbonate that is necessary for sperm capacitation; however, whether its involvement is direct or indirect remains unclear. The present study investigated the possibility of a Cl<sup>-</sup>/HCO<sub>3</sub><sup>-</sup> exchanger (solute carrier family 26, number 3 [SLC26A3]) operating with CFTR during guinea pig sperm capacitation. Incubating sperm in media with various concentrations of Cl<sup>-</sup> resulted in varied percentages of capacitated sperm in a concentration-dependent manner. Depletion of Cl<sup>-</sup>, even in the presence of HCO<sub>3</sub><sup>-</sup>, abolished sperm capacitation and vice versa, indicating the involvement of both anions in the process. Capacitation-associated HCO<sub>3</sub><sup>-</sup>-dependent events, including increased intracellular pH, cAMP production, and protein tyrosine phosphorylation, also depend on Cl<sup>-</sup> concentrations. Similar Cl<sup>-</sup> dependence and inhibitor sensitivity were observed for sperm-hyperactivated motility and for sperm-egg fusion. The expression and localization of CFTR and SLC26A3 were demonstrated using immunostaining and Western blot analysis. Taken together, our results indicate that Cl<sup>-</sup> is required for the entry of HCO<sub>3</sub><sup>-</sup> that is necessary for sperm capacitation, implicating the involvement of SLC26A3 in transporting HCO<sub>3</sub><sup>-</sup>, with CFTR providing the recycling pathway for Cl<sup>-</sup>.

bicarbonate, CFTR, chloride, SLC26A3, sperm capacitation

## INTRODUCTION

Spermatozoa must undergo an activation process called capacitation, which consists of morphological, biochemical, and

physiological changes in sperm necessary to acquire fertilizing potential [1, 2]. It has been demonstrated that HCO<sub>3</sub><sup>-</sup> is essential for capacitation, as prevention of HCO<sub>3</sub><sup>-</sup>-induced intracellular alkalization results in failure of capacitation [3–7]. Impaired HCO<sub>3</sub><sup>-</sup> secretion by endometrial epithelium also reduced capacitation and fertilizing capacity in cocultured sperm [8].

Although HCO<sub>3</sub><sup>-</sup> has been shown to activate soluble adenylylase cyclase in the cytoplasm of sperm as the initial step in a series of events, including intracellular cAMP production and protein tyrosine phosphorylation, that lead to capacitation [5, 9–11], how HCO<sub>3</sub><sup>-</sup> is transported into sperm remained unanswered. Our recent studies demonstrated a crucial role of cystic fibrosis transmembrane conductance regulator (CFTR), an anion channel known to conduct Cl<sup>-</sup> and HCO<sub>3</sub><sup>-</sup> [12, 13] in the process of capacitation [14, 15]. Disruption of CFTR function by its inhibitors or antibodies was shown to reduce the number of capacitated sperm and to affect several capacitation-associated HCO<sub>3</sub><sup>-</sup>-dependent events such as increased intracellular pH (pHi), membrane hyperpolarization, and cAMP production, indicating the involvement of CFTR in the transport of HCO<sub>3</sub><sup>-</sup>. Sperm from cystic fibrosis (CF) heterozygous mice also had reduced fertilizing capacity in vitro and in vivo, confirming an important role of CFTR in determining sperm-fertilizing capacity. However, it was unclear whether CFTR directly conducts HCO<sub>3</sub><sup>-</sup> or acts as a Cl<sup>-</sup> channel working in parallel with a Cl<sup>-</sup>/HCO<sub>3</sub><sup>-</sup> exchanger, thereby providing a recycling pathway for the Cl<sup>-</sup> that is necessary to operate the anion exchanger, as is the case in pancreatic ductal HCO<sub>3</sub><sup>-</sup> secretion [16–18]. We undertook the present study to test the latter possibility, as a Cl<sup>-</sup>/HCO<sub>3</sub><sup>-</sup> exchanger has been reported in sperm [19–21]. The Cl<sup>-</sup> dependence would seem to be required for operation of the exchanger, which would not be necessary if CFTR conducts HCO<sub>3</sub><sup>-</sup> directly. Therefore, the primary goals of the present study were to examine the dependence of sperm capacitation and the associated HCO<sub>3</sub><sup>-</sup>-dependent events on Cl<sup>-</sup> concentrations in the minimal capacitating medium (MCM), as well as the sensitivity of these events to inhibitors of CFTR and the anion exchanger.

Capacitation is also a prerequisite for the sperm acrosome reaction (AR), an exocytic process releasing hydrolytic enzymes from the acrosome to enable sperm penetration of the egg investments and cell membrane in response to natural agonists such as progesterone and the zona pellucida (ZP) [22, 23]. Therefore, sperm capacitation can be defined as the acquisition of the capacity of sperm to undergo the AR [24,

<sup>1</sup>Supported by grant 2006CB504002 from the National “973” Project of China, by grants 30270513 and 30600217 from the National Science Foundation of China, by grant CUHK4534/05M from the Li Ka Shing Institute of Health Sciences of The Chinese University of Hong Kong and the Research Grants Council of Hong Kong, by grant WKJ 2005204701 from the Ministry of Public Health of China, and by grant 2006B002 from the Zhejiang Province Medical Science Research Fund. H.C.C. received the Croucher Senior Research Fellowship for 2007–2008.

<sup>2</sup>Correspondence: FAX: 852 26035022; e-mail: hsiaocchan@cuhk.edu.hk

<sup>3</sup>Correspondence: FAX: 86 571 8807 5447; e-mail: qx\_shi@126.com

Received: 20 February 2008.

First decision: 7 March 2008.

Accepted: 22 August 2008.

© 2009 by the Society for the Study of Reproduction, Inc.

ISSN: 0006-3363. <http://www.biolreprod.org>

25], and a practical approach to assess capacitation is to measure the ability of sperm to undergo an induced AR, even if capacitation and the AR are two separate events. This approach exploits the operational definition of capacitation [22, 26], namely, measuring the increase in the number of acrosome-reacted sperm in response to an AR inducer, which in general seems to be reliable when the natural AR inducers progesterone and ZP are used. Therefore, the present study investigates the possible involvement of a  $\text{Cl}^-/\text{HCO}_3^-$  exchanger and CFTR in transporting  $\text{HCO}_3^-$ , which is important for capacitation. The study assesses the induced AR in guinea pig sperm, a model that has been used conventionally for its ease in detection of acrosome exocytosis from the sperm head [27], in conjunction several other biochemical and fluorimetric techniques to monitor different capacitation-associated events.

## MATERIALS AND METHODS

### Media Preparation

The media used throughout the study comprised a low- $\text{Ca}^{2+}$  MCM that consisted of 111.76 mM NaCl, 2.7 mM KCl, 0.49 mM  $\text{MgCl}_2$ , 25.07 mM  $\text{NaHCO}_3$ , 2.78 mM glucose, 10 mM sodium lactate, 1.0 mM sodium pyruvate, 50  $\mu\text{g}$  of kanamycin monosulfate/ml, 20 mM Hepes, and 4mg/ml of bovine serum albumin (Fraction V, A3059; Sigma, St. Louis, MO). The pH was 7.9, with a final osmolality of 300–305 mOsm/kg. No  $\text{Ca}^{2+}$  was added, although when measured as described previously [28, 29], the  $\text{Ca}^{2+}$  concentration was 23  $\mu\text{M}$ . This low- $\text{Ca}^{2+}$  MCM induces capacitation of guinea pig spermatozoa under in vitro conditions but does not support the AR [29–31]. The AR can occur only with the addition of  $\text{Ca}^{2+}$  [32, 33]; therefore, 2 mM  $\text{CaCl}_2$  was added when the AR was induced. This medium contained  $115.3 \pm 1.7$  mM  $\text{Cl}^-$ ,  $n = 3$  (hereafter referred to as complete MCM). The  $\text{Cl}^-$  in this medium was replaced with gluconic acid to yield  $\text{Cl}^-$ -deficient MCM ( $26.0 \pm 0.4$   $\mu\text{M}$ ,  $n = 3$ ).

### Isolation and Preparation of ZP

Ovaries were obtained from female guinea pigs (age, 21–22 days) and were homogenized in cold buffer as described previously [29]. Briefly, the homogenate was washed through a two-step Percoll gradient (10%–20%), and the zonae were isolated by examining the samples of various layers under a phase-contrast microscope. The band containing most of the ZP was located in the interphase between the homogenate and the 10% Percoll. Zonae were stored at  $-20^\circ\text{C}$  until the day of use, when they were solubilized at  $60^\circ\text{C}$  for 1 h, rendering them heat stabilized.

### Evaluation of Sperm Capacitation

White and black retired male breeder guinea pigs were purchased from the Laboratory Animal Service Center of The Chinese University of Hong Kong and the Experimental Animal Center of Zhejiang Province. All animal experiments were approved by the animal experimentation ethics committee of The Chinese University of Hong Kong and by the local ethics committee of Zhejiang Province. All guinea pigs were housed and then euthanized. The spermatozoa from guinea pig vas deferens and cauda epididymis were washed for 18 min at  $600 \times g$  through a Percoll gradient (85%–55%–35%) and were adjusted to  $2\text{--}3 \times 10^6$  cells/ml (unless indicated otherwise), resuspended in complete or  $\text{Cl}^-$ -deficient MCM, and incubated at  $38.5^\circ\text{C}$  for 6 h [29, 34]. Sperm capacitation was evaluated by the induction of rapid synchronization of the AR following the addition of 2 mM  $\text{Ca}^{2+}$  and progesterone or ZP [29, 35]. To assess the capacitation-dependent spontaneous or induced AR, spermatozoa were first exposed to reagents or their solvents as controls for 6 h to capacitate them and were then washed, resuspended in the desired medium, and treated with 2 mM  $\text{Ca}^{2+}$  or other agonists for 15 min before assaying the AR using phase-contrast microscopy. The percentage of AR was determined among 600 motile spermatozoa. The spermatozoa that had lost their acrosomal caps without losing motility were recorded as acrosome reacted.

### Measurement of pH<sub>i</sub> in Spermatozoa

The level of pH<sub>i</sub> was determined by cells loaded with 2',7'-bis-(2-carboxyethyl)-5-(and-b)-carboxyfluorescence, acetoxymethyl ester (BCECF) as previously described [14], with minor modifications. Briefly, caudal epididymal spermatozoa were obtained from retired breeder guinea pigs and

were adjusted to  $\sim 2 \times 10^6$  cells/ml in complete MCM and in  $\text{Cl}^-$ -deficient MCM. Spermatozoa were then incubated in a 5%  $\text{CO}_2$  incubator at  $38.5^\circ\text{C}$ . When needed, 5  $\mu\text{M}$  BCECF was added, and the incubation continued for an additional 30 min. Following this, the cells were pelleted and washed twice to remove free dye before measurement of pH<sub>i</sub>. Fluorescence was detected by an excitation ratio of 490:440 nm (emission, 520 nm) using a luminescence spectrometer (LS50B; Perkin-Elmer, Norwalk, CT). Calibration was performed according to the method by Fraire-Zamora and Gonzalez-Martinez [36], with modification. Briefly, at the end of each trace, 10  $\mu\text{l}$  of 5 mM nigericin was added to permeabilize the cells, the pH was then acidified with 10  $\mu\text{l}$  of HCl, and the measured pH values (determined with a conventional pH meter) were compared with the corresponding ratio values. Usually, we make three additions before ending the experiment. These data were analyzed using Prism 3.0 software (GraphPad Software, San Diego, CA) to convert ratios to pH values.

### Intracellular cAMP Measurement

Spermatozoa were incubated in complete or  $\text{Cl}^-$ -deficient MCM and in  $\text{HCO}_3^-$ -deficient MCM for 6 h. Fifty microliters of sperm suspension ( $\sim 10^6$  cells/ml) was added to an equal volume of the same medium. Incubations were ended by the addition of five volumes of ice-cold 100 mM HCl in 100% ethanol. Samples were kept on ice for 30 min and were then lyophilized and assayed for cAMP (Assay Designs, Ann Arbor, MI) using the manufacturer's protocol for acetylated samples.

### Protein Tyrosine Phosphorylation of Spermatozoa

Incubated sperm were centrifuged at  $5000 \times g$  for 3 min at room temperature, washed once in 1 ml of PBS, resuspended in sample buffer without mercaptoethanol and boiled for 5 min, and then centrifuged and boiled in the presence of 5% 2-mercaptoethanol for 5 min. Next, SDS-PAGE was performed in 10% gels with constant 100 V for 1.5 h, followed by transfer to polyvinylidene fluoride membrane for 1 h at  $4^\circ\text{C}$ . The membrane was blocked and then incubated with primary antibody (1:2000), a monoclonal mouse antibody against phosphotyrosine (p-Tyrosine, 4G10; Cell Signaling Technology, Boston, MA), at  $4^\circ\text{C}$  overnight. After washing with Tris-buffered saline Tween-20 (TBST) four times, membrane was incubated with the secondary antibody (1:7500), peroxidase-conjugated affinity-purified anti-mouse IgG (Rockland, Gilbertsville, PA), for 1 h at room temperature and then washed four times with TBST. Positive immunoreactive bands were detected using an enhanced chemiluminescence (ECL) kit (Lumi-Light plus Western blotting detection reagents, RPN2106; GE Healthcare, Little Chalfont, England) according to the manufacturer's instructions.

### Assessment of Sperm-Fertilizing Capacity

To ascertain whether  $\text{Cl}^-$  has a role in sperm-fertilizing ability, we used a zona-free hamster egg assay as a test system for appraisal of the fertilizing ability of guinea pig spermatozoa. This method has been described previously [37, 38].

### Assessment of Sperm-Hyperactivated Motility

Sperm-hyperactivated motility (HAM) accompanies sperm capacitation. HAM represents a change in motility pattern, specifically an increase in the amplitude of the flagella bend and average lateral head movement. No software for analysis of guinea pig sperm motility is available, to our knowledge. In this study, three characteristic movement patterns were considered hyperactivated motility as described previously [35], with some modifications as follows: 1) sperm head exhibiting marked lateral placement, with forward motility and tail whiplash movement; 2) sperm forward progressive movement, with a nonlinear trajectory; 3) sperm head equatorial segment attachment to the slide surface, displaying quick swinging with flagella movements that are much greater in the flagellum than in the head, without cell progression [39, 40].

### Immunofluorescence Staining

For indirect immunofluorescence studies of CFTR and SLC26A3 (solute carrier family 26, number 3) localization, spermatozoa were washed by centrifugation through a three-layer gradient of Percoll as already described. Sperm were fixed in 4% paraformaldehyde overnight at  $4^\circ\text{C}$  and were then smeared on slides previously coated with poly-L-lysine and air dried. After washing with PBS three times, the slides were blocked with 10% normal goat serum at room temperature for 1 h. After further washing in PBS twice for 5 min each, sperm were incubated with primary CFTR antibody (CF3, ab2784, 1:500; Abcam, Cambridge, England), mouse isotype-specific IgM (Rockland) as a CFTR negative control, or SLC26A3 antibody (1:250; a gift from Dr. P.

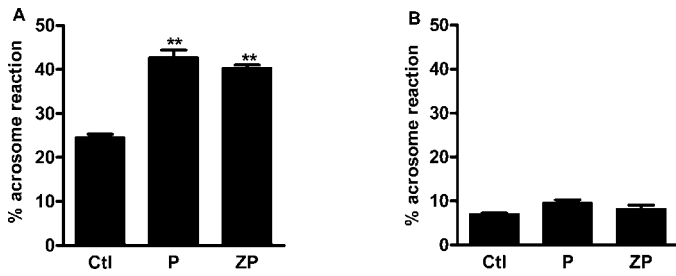

FIG. 1. Dependence of sperm capacitation on Cl<sup>-</sup> in MCM. Capacitation in guinea pig sperm was assessed by their ability to undergo the agonist-induced AR after incubation for 6 h in MCM with or without Cl<sup>-</sup>. Results are means ± SEM (n = 3). **A**) Sperm were initially incubated in MCM for capacitation, then washed and resuspended in Cl<sup>-</sup>-deficient MCM (Ctl), and stimulated with progesterone (P, 10 μM) or ZP (ZP, 1 ZP/μl) for 15 min before the AR assessment. **B**) The progesterone- or ZP-induced AR was greatly suppressed when sperm were incubated in Cl<sup>-</sup>-deficient MCM for 6 h and switched to complete MCM for the AR induction, indicating the dependence of capacitation but not the AR on Cl<sup>-</sup>. \*\*Compared with the control and Cl<sup>-</sup>-deficient MCM, respectively, *P* < 0.001.

Höglund) at 4°C overnight. Sperm were washed with PBS three times and were incubated with secondary antibody (anti-mouse IgG+IgM-fluorescein isothiocyanate [FITC], ab47830, 1:1000; Abcam; and Alexa 488-conjugated goat anti-rabbit IgG, A11008, 1:1000; Invitrogen, San Diego, CA) in a dark room for 1 h at room temperature. Unbound antibody was removed by washing with PBS three times. The slides were then stored in a dark box before visualization.

### Western Blotting

Proteins were resolved by SDS-PAGE on polyacrylamide gels, followed by transfer onto nitrocellulose membranes. Membranes were blocked with 4% milk in TBST for 1 h before being probed with primary mouse anti-human CFTR monoclonal antibody (CF3, ab2784, 1:2000; Abcam) or SLC26A3 antibody (sc34943, 1:500; Santa Cruz Biochemicals, Santa Cruz, CA) or its blocking peptide (sc34942p; Santa Cruz) at 4°C overnight. Membranes were washed three times in TBST, followed by incubation with 1:10000 anti-mouse IgG-horseradish peroxidase (HRP) (ab6006, 1:10000; Abcam) or 1:5000 donkey anti-goat IgG-HRP (sc2033; Santa Cruz) in TBST containing 1% BSA for 1 h at room temperature. Following three washes in TBST, proteins were detected using an enhanced chemiluminescence kit (ECL plus Western blotting detection reagents, RPN2132; GE HealthCare) according to the manufacturer's instructions.

### Statistical Analysis

Results are given as means ± SEM. For statistical analysis, percentage data were transformed (arcsin √[percentage of cells/100]), and comparisons were

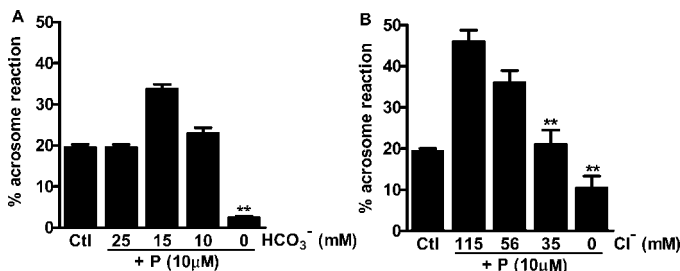

FIG. 2. Sperm capacitation requires both Cl<sup>-</sup> and HCO<sub>3</sub><sup>-</sup>. **A**) Effect of varying HCO<sub>3</sub><sup>-</sup> concentrations on capacitation. Washed sperm were incubated in MCM with different concentrations of HCO<sub>3</sub><sup>-</sup> but with constant Cl<sup>-</sup> concentration (115 mM) for 6 h and then switched to Cl<sup>-</sup>/HCO<sub>3</sub><sup>-</sup> complete MCM for the AR induction (n = 5). **B**) Effect of varying Cl<sup>-</sup> concentrations on capacitation. Sperm were incubated in MCM with different concentrations of Cl<sup>-</sup> but with constant HCO<sub>3</sub><sup>-</sup> concentration (25 mM) for 6 h and were then switched to Cl<sup>-</sup>/HCO<sub>3</sub><sup>-</sup> complete MCM for the AR induction (n = 3). Depletion of HCO<sub>3</sub><sup>-</sup> or Cl<sup>-</sup> prevented capacitation. Results are means ± SEM. \*\*Compared with highest anion concentration, *P* < 0.001. The MCM incubation without progesterone (P, 10 μM) induction serves as a control (Ctl).

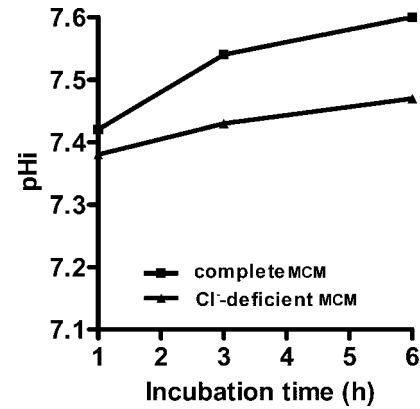

FIG. 3. The Cl<sup>-</sup> dependence of sperm pH<sub>i</sub>. Washed spermatozoa were incubated in Cl<sup>-</sup>-deficient or complete MCM. Five micromolar BCECF was loaded for 30 min before determination of the pH<sub>i</sub>. The representative time course changes in pH<sub>i</sub> during capacitation showed suppressed increase in pH<sub>i</sub> when sperm were incubated in Cl<sup>-</sup>-deficient MCM compared with those incubated in complete MCM.

made using one-way ANOVA, followed by Tukey or Dunnett post hoc tests. *P* < 0.05 was considered statistically significant.

## RESULTS

### Dependence of Sperm Capacitation on Cl<sup>-</sup> Concentrations

Using the sperm AR for assessing capacitation (two separate events), it was necessary to distinguish the effect of Cl<sup>-</sup> on sperm capacitation from its effects on the AR. To do that, Cl<sup>-</sup> replacement was made separately in deficient MCM or in complete MCM in which the AR was induced. When washed sperm were incubated initially in complete MCM for 6 h, followed by thorough washing and resuspension in Cl<sup>-</sup>-deficient MCM, there was a significant increase in the percentage of the AR compared with that in the control in response to stimulation with 10 μM progesterone or with ZP (1 ZP/μl) for 15 min (Fig. 1A). However, when sperm were incubated in Cl<sup>-</sup>-deficient MCM but resuspended in complete MCM during the AR induction, the percentage of AR was greatly reduced, with no significant difference between treatments of sperm regardless of the stimulus used (Fig. 1B), indicating that Cl<sup>-</sup> has an essential role in sperm capacitation but not in the AR itself.

### Sperm Capacitation Requires Both Cl<sup>-</sup> and HCO<sub>3</sub><sup>-</sup>

Because HCO<sub>3</sub><sup>-</sup> had been shown to initiate sperm capacitation, we then tried to determine whether the effect of Cl<sup>-</sup> on sperm capacitation could be independent of HCO<sub>3</sub><sup>-</sup>. Two sets of experiments were performed. One set was conducted using MCM at different HCO<sub>3</sub><sup>-</sup> concentrations with a normal Cl<sup>-</sup> concentration (115 mM). As shown in Figure 2A, sperm capacitation was reduced as the concentration of HCO<sub>3</sub><sup>-</sup> in the MCM decreased, with total abolishment when HCO<sub>3</sub><sup>-</sup>-deficient MCM was used for incubation, confirming an essential role of HCO<sub>3</sub><sup>-</sup> in the process of capacitation.

The other set of experiments was performed using MCM of various Cl<sup>-</sup> concentrations with a constant HCO<sub>3</sub><sup>-</sup> concentration (25 mM). After incubation for 6 h, sperm were incubated in complete MCM and were stimulated with progesterone for 15 min before assessing the AR. The results showed that sperm capacitation decreased with decreasing Cl<sup>-</sup> concentrations in the MCM, despite the presence of a sufficient amount of HCO<sub>3</sub><sup>-</sup> (Fig. 2B), indicating that sperm capacitation requires

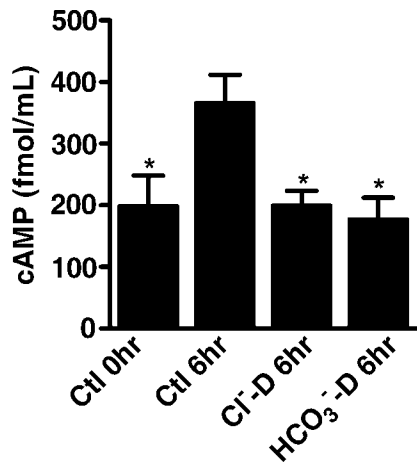

FIG. 4. Effect of  $\text{Cl}^-$  and  $\text{HCO}_3^-$  on capacitation-associated increases in sperm intracellular cAMP levels. Washed sperm were incubated separately in complete MCM (Ctl) for 0 h and 6 h or in  $\text{Cl}^-$ -deficient ( $\text{Cl}^-$ -D) and  $\text{HCO}_3^-$ -deficient ( $\text{HCO}_3^-$ -D) MCM for 6 h before intracellular cAMP measurement ( $n = 3$ ). Results are means  $\pm$  SEM. \*Compared with control 6 h,  $P < 0.05$ .

$\text{Cl}^-$  and  $\text{HCO}_3^-$ , with the possibility that  $\text{Cl}^-$  may be required for the transport of  $\text{HCO}_3^-$  into sperm.

#### Effect of $\text{Cl}^-$ on Increased pHi During Capacitation

An increase in pHi of sperm due to the entry of  $\text{HCO}_3^-$  is an early hallmark event in the process of capacitation. Indeed, when sperm were incubated in complete MCM, the pHi increased with time (Fig. 3); however, it remained almost unchanged in  $\text{Cl}^-$ -deficient MCM throughout the period of capacitation, consistent with the observed  $\text{Cl}^-$  dependence of sperm capacitation.

#### Effect of $\text{Cl}^-$ and $\text{HCO}_3^-$ on Sperm cAMP Levels

If  $\text{Cl}^-$  is required for transporting  $\text{HCO}_3^-$  into sperm (such as in the case of an anion exchanger) depletion of  $\text{Cl}^-$  should affect  $\text{HCO}_3^-$ -dependent events that are known to be involved in sperm capacitation. We first examined whether cAMP

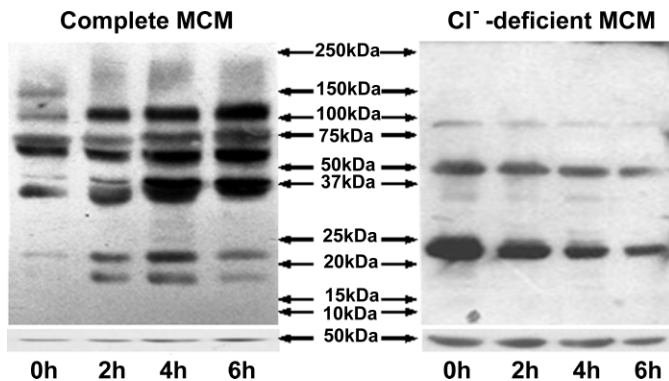

FIG. 5. Effect of depleted  $\text{Cl}^-$  on sperm protein tyrosine phosphorylation. Washed spermatozoa were incubated under capacitation conditions at 0, 2, 4, and 6 h, and then proteins were extracted for Western blot analysis. The primary antibody, a monoclonal mouse antibody against phosphotyrosine (p-Tyrosine, 4G10) 1:2000, and the second antibody, peroxidase-conjugated affinity-purified anti-mouse IgG 1:7500, were used. Left: Protein tyrosine phosphorylation in guinea pig sperm incubated in complete MCM. Right: Protein tyrosine phosphorylation in sperm incubated in  $\text{Cl}^-$ -deficient MCM showing reduced phosphorylated protein with time.

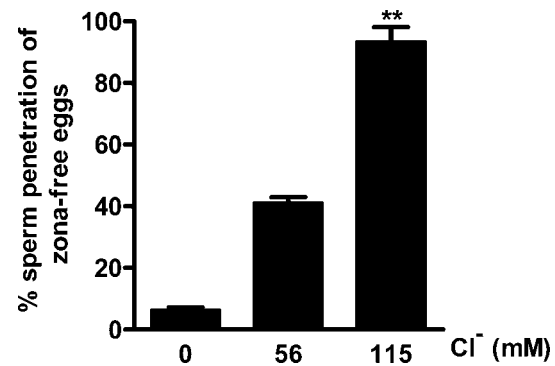

FIG. 6. Effect of  $\text{Cl}^-$  on sperm-egg fusion. Washed sperm were preincubated separately in complete MCM under capacitation conditions for 6 h and were then cocultured with 20–30 zona-free hamster eggs in complete BWV (final  $\text{Cl}^-$  concentration,  $\sim 56$  mM) or in  $\text{Cl}^-$ -deficient BWV (final  $\text{Cl}^-$  concentration,  $\sim 115$  mM) or in  $\text{Cl}^-$ -deficient BWV (final  $\text{Cl}^-$  concentration, 0 mM) for 3 h. In addition, sperm were incubated in  $\text{Cl}^-$ -deficient MCM for 6 h, washed, and then cocultured with 20–30 zona-free hamster eggs in  $\text{Cl}^-$ -deficient BWV (final  $\text{Cl}^-$  concentration, 0 mM) for 3 h. The percentage of spermatozoal penetration into eggs was assessed ( $n = 3$ ). Results are means  $\pm$  SEM. \*\*Compared with  $\sim 56$  mM  $\text{Cl}^-$  and with  $\text{Cl}^-$ -deficient medium (0 mM  $\text{Cl}^-$ ),  $P < 0.001$ .

production resulting from  $\text{HCO}_3^-$  activation of soluble adenylate cyclase could be affected by  $\text{Cl}^-$  depletion. Sperm were incubated separately in  $\text{Cl}^-/\text{HCO}_3^-$  complete MCM or in  $\text{Cl}^-$ -deficient or  $\text{HCO}_3^-$ -deficient MCM for 6 h. The intracellular cAMP levels in sperm measured by ELISA (Fig. 4) showed that the mean level of cAMP in sperm incubated in  $\text{Cl}^-/\text{HCO}_3^-$  complete MCM for 6 h was significantly elevated compared with that observed in the control (0 h). However, this elevation of intracellular cAMP was completely abolished when sperm were incubated in  $\text{Cl}^-$ -deficient or  $\text{HCO}_3^-$ -deficient MCM for the same amount of time ( $P < 0.05$ ). The effect of  $\text{Cl}^-$  depletion on sperm cAMP levels was similar to that of  $\text{HCO}_3^-$  depletion, indicating the possible involvement of a similar mechanism in both cases, with the most likely candidate being an anion exchanger. Depletion of either ion ceases operation of the exchanger, resulting in the failure of  $\text{HCO}_3^-$  entry and cAMP production.

#### Effect of $\text{Cl}^-$ on Capacitation-Related Protein Tyrosine Phosphorylation

To further confirm whether  $\text{Cl}^-$  is involved in mediating capacitation-associated  $\text{HCO}_3^-$ -dependent processes, its effect on protein tyrosine phosphorylation during sperm capacitation was examined. Washed sperm were separately incubated in  $\text{Cl}^-/\text{HCO}_3^-$  complete MCM or in  $\text{Cl}^-$ -deficient MCM for 0, 2, 4, and 6 h. The results showed that sperm incubated in  $\text{Cl}^-/\text{HCO}_3^-$  complete MCM were accompanied by a time-dependent increase in protein tyrosine phosphorylation of a subset of proteins of 25–120 kDa normally observed during sperm capacitation. However, sperm incubated in  $\text{Cl}^-$ -deficient MCM showed reduced protein tyrosine phosphorylation, with only two phosphorylated proteins at about 23 and 50 kDa observed (Fig. 5). These two protein bands were also attenuated with incubation time in the absence of  $\text{Cl}^-$  in MCM, suggesting that  $\text{Cl}^-$  is also required for protein tyrosine phosphorylation, a well-known event downstream of  $\text{HCO}_3^-$  activation of cAMP production.

#### Effect of $\text{Cl}^-$ on Sperm-Fertilizing Capacity

In vitro fertilization may measure the actual physiological function of the sperm-capacitated status. To determine whether

sperm-fertilizing ability is affected by Cl<sup>-</sup>, we used a zona-free hamster egg model as a test system for the assessment of fertilizing capacity in guinea pig spermatozoa [37, 38, 41]. Washed sperm were preincubated in complete or Cl<sup>-</sup>-deficient MCM for 6 h. Zona-free hamster eggs in complete or Cl<sup>-</sup>-deficient Biggers-Whitten-Whittingham medium (BWW) were introduced separately into sperm suspension (1:1, 50  $\mu$ l each) in complete or Cl<sup>-</sup>-deficient MCM for coincubation for 3 h. Sperm were exposed to a constant concentration of complete Cl<sup>-</sup> (~115 mM), a half concentration of Cl<sup>-</sup> (~56 mM), or Cl<sup>-</sup>-deficient medium (both MCM and BWW Cl<sup>-</sup> deficient). As shown in Figure 6, the penetration rate of sperm declined significantly with a decrease in concentration of Cl<sup>-</sup> in the medium. Sperm-egg fusion almost ceased when spermatozoa and eggs were exposed in both types of Cl<sup>-</sup>-deficient media. To evaluate whether Cl<sup>-</sup> directly affects the fertilizing ability of zona-free hamster eggs, we preincubated the eggs in one-third Cl<sup>-</sup> BWW medium for 3 h, washed them in complete BWW medium, and then resuspended them in the same medium for coculture for 3 h. Similarly, sperm were preincubated in complete MCM for 6 h and were then mixed with eggs for 3 h as already described. Fertilizing capacity of the zona-free hamster eggs was not significantly affected and was similar to that in complete MCM (data not shown).

#### Effects of Inhibitors and Antibody of SLC26A3 and CFTR on Capacitation-Associated HCO<sub>3</sub><sup>-</sup>-Dependent Events

Although we had previously demonstrated an important role of CFTR in transporting HCO<sub>3</sub><sup>-</sup> into sperm that is necessary for capacitation [14], the observed Cl<sup>-</sup> dependence of capacitation-associated HCO<sub>3</sub><sup>-</sup>-dependent events suggested additional

involvement of an exchanger for Cl<sup>-</sup>/HCO<sub>3</sub><sup>-</sup>. Because SLC26A3 mutations in men have been associated with subfertility [42], the exchanger may be involved in sperm capacitation, perhaps working together with CFTR for the transport of HCO<sub>3</sub><sup>-</sup>. We tested this hypothesis by examining the effects of inhibitors of CFTR and of the candidate anion exchanger, SLC26A3, as well as its antibody on several capacitation-associated events in the following experiments.

*CFTRinh-172, niflumate, and SLC26A3 antibody inhibit sperm capacitation.* CFTR inhibitor (CFTRinh-172) in various concentrations (5–100 nM) was added to sperm suspensions at the beginning of capacitation, incubated for 6 h, and then washed and resuspended in inhibitor-free MCM challenged with 10  $\mu$ M progesterone for 15 min before measurement of the AR. As shown in Figure 7A, compared with the progesterone-induced AR, the percentage of AR decreased significantly with increased concentrations of CFTRinh-172 in the MCM ( $P < 0.001$ ), indicating the involvement of CFTR in sperm capacitation. When sperm were capacitated in HCO<sub>3</sub><sup>-</sup>-deficient MCM, there was no significant difference between the progesterone-induced and CFTRinh-172 groups. Similarly, niflumate (an inhibitor more selective for SLC26A3) at various concentrations (1–100  $\mu$ M) or 4,4'-di-isothiocyanatostilbene-2, 2'-disulfonic acid (DIDS, 1–100  $\mu$ M) (an inhibitor of several anion exchangers that are sensitive to SLC26A6 and the SLC4 family) was added to the capacitating medium but not to the medium for inducing the AR. As shown in Figure 7B, a comparison of the concentration-dependent effects between niflumate and DIDS showed a more potent effect of niflumate over that of DIDS. There was no significant difference between the two treatments when sperm were incubated in HCO<sub>3</sub><sup>-</sup>-deficient MCM (Fig. 7C).

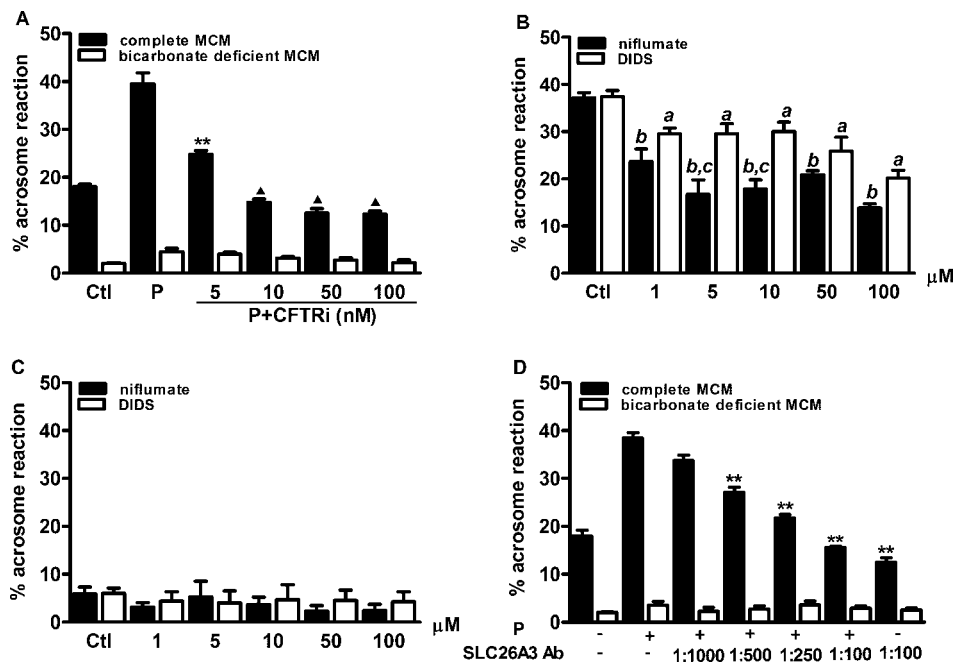

FIG. 7. Effects of CFTR inhibitor (CFTRI) and anion exchanger inhibitors, as well as SLC26A3 antibody, on capacitation with or without bicarbonate. Washed sperm were incubated in complete or HCO<sub>3</sub><sup>-</sup>-deficient MCM without (Ctl) or with CFTRinh-172 (CFTRI, 5–100 nM), niflumate (1–100  $\mu$ M), DIDS (1–100  $\mu$ M), or SLC26A3 antibody (1:1000 to 1:100) separately for capacitation and were then washed and challenged with progesterone (P, 10  $\mu$ M) for 15 min before the AR assessment. Results are means  $\pm$  SEM. **A**) Inhibitory effect of CFTRI on capacitation ( $n = 6-8$ ). \*\*Compared with the progesterone-treated group,  $P < 0.001$ ; triangle, compared with the CFTRI 5 nM group,  $P < 0.001$ . **B**) Comparison of concentration-dependent inhibitory effects of niflumate and DIDS on capacitation in complete MCM ( $n = 3$ ). *a*, Compared with DIDS control (Ctl),  $P < 0.05-0.001$ ; *b*, compared with niflumate Ctl,  $P < 0.001$ ; *c*, compared with corresponding DIDS treatment,  $P < 0.01$ . **C**) Comparison of concentration-dependent inhibitory effects of niflumate and DIDS on capacitation in HCO<sub>3</sub><sup>-</sup>-deficient MCM ( $n = 3$ ). **D**) Effect of SLC26A3 antibody (Ab) on capacitation. ( $n = 3$ ). \*\*Compared with the progesterone-treated group,  $P < 0.001$ .

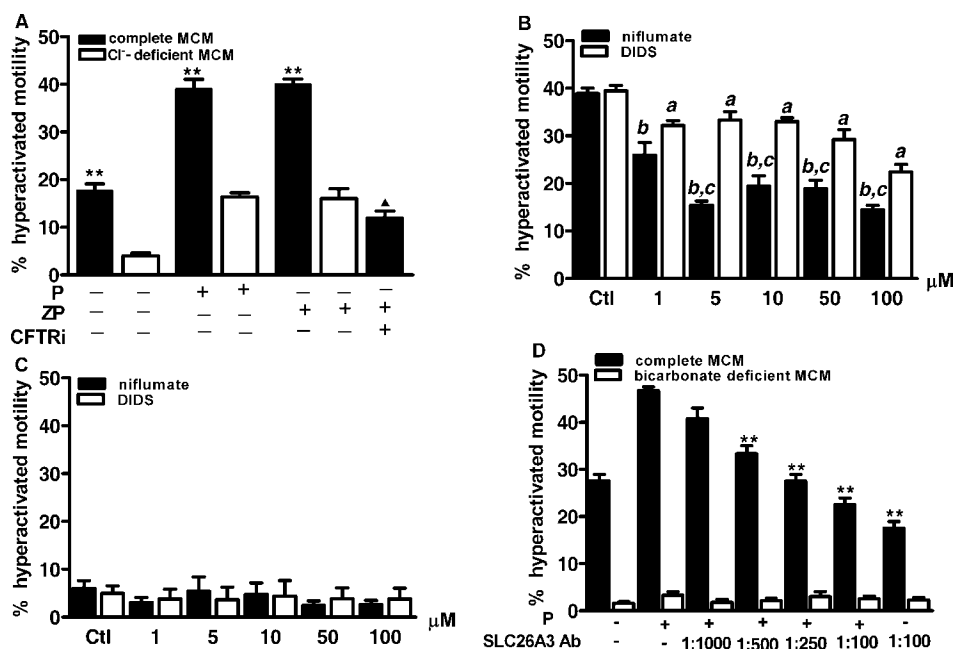

FIG. 8. Effects of  $\text{Cl}^-$  and transport inhibitors, as well as SLC26A3 antibody, on HAM with or without bicarbonate. Washed sperm were incubated in  $\text{Cl}^-$ -deficient MCM, complete MCM, or  $\text{HCO}_3^-$ -deficient MCM with or without CFTRinh-172 (CFTRi, 100 nM), niflumate (1–100  $\mu\text{M}$ ), DIDS (1–100  $\mu\text{M}$ ), or SLC26A3 antibody (1:1000 to 1:100) separately for capacitation and were then washed and challenged with progesterone (10  $\mu\text{M}$ ) or ZP (1 ZP/ $\mu\text{l}$ ) for 15 min before HAM assessment. Results are means  $\pm$  SEM. **A**) Depletion of  $\text{Cl}^-$  and CFTRi reduced sperm HAM (n=3). \*\*Compared with  $\text{Cl}^-$ -deficient MCM,  $P < 0.001$ ; triangle, compared with ZP treatment in complete MCM,  $P < 0.001$ . **B**) Comparison of concentration-dependent inhibitory effects of niflumate and DIDS on HAM in complete MCM (n=3). a, Compared with DIDS control (Ctl),  $P < 0.05$ –0.001; b, compared with niflumate Ctl,  $P < 0.001$ ; c, compared with corresponding DIDS treatment,  $P < 0.05$ –0.001. **C**) Comparison of concentration-dependent inhibitory effects of niflumate and DIDS on HAM in  $\text{HCO}_3^-$ -deficient MCM (n=3). **D**) Effect of SLC26A3 antibody (Ab) on sperm HAM (n=3). \*\*Compared with progesterone-treated group,  $P < 0.001$ .

Because the inhibitors used may not be exclusive for SLC26A3, its specific antibody was also used. Various concentrations of SLC26A3 antibody (1:100 to 1:1000) were added to sperm suspensions for capacitation for 6 h and then were washed, resuspended in antibody-free medium, and challenged with 10  $\mu\text{M}$  progesterone for 15 min before assessment of the AR. As shown in Figure 7D, the AR was markedly reduced with increased concentrations of antibody in the medium compared with the progesterone-treated group ( $P < 0.001$ ), indicating the involvement of SLC26A3. When capacitated in  $\text{HCO}_3^-$ -deficient MCM, there were no significant differences between the various treatment groups.

**Sperm-hyperactivated motility.** HAM is a capacitation-associated event that may also serve as a potential assay for capacitation [39, 40]. First, it was necessary to confirm whether  $\text{Cl}^-$  would have a similar effect on HAM as it did on the other capacitation-associated events already described. Washed sperm were incubated separately in  $\text{Cl}^-$ -deficient or complete MCM with or without CFTR inhibitor (CFTRinh-172) for 6 h and were then stimulated with progesterone (10  $\mu\text{M}$ ) or ZP (1 ZP/ $\mu\text{l}$ ) for 15 min before assessment for sperm HAM. As shown in Figure 8A, sperm in complete MCM in response to progesterone or ZP exhibited significantly higher HAM than sperm in  $\text{Cl}^-$ -deficient MCM. When CFTRinh-172 was added, the ZP-induced AR was inhibited. Similar to the results observed with the induced AR, the inhibitors of anion exchangers, as well as its antibody, also significantly inhibited sperm HAM (Fig. 8, B and D), further confirming the involvement of SLC26A3 in the process of sperm capacitation. When the concentration-dependent effects of niflumate vs. DIDS were compared, a more potent effect of niflumate was observed over that of DIDS ( $P < 0.05$  to  $P < 0.001$ ) (Fig. 8B).

Similarly, there were no differences between niflumate and DIDS treatments or among different concentrations of SLC26A3 antibody when sperm were capacitated in  $\text{HCO}_3^-$ -deficient MCM (Fig. 8, C and D).

#### Expression and Localization of CFTR and SLC26A3 in Sperm

The functional studies herein clearly demonstrated the involvement of CFTR and an anion exchanger, which is likely to be SLC26A3; however, their expression and localization have not been demonstrated in guinea pig sperm, to our knowledge. In fact, SLC26A3 has not been shown to be expressed in sperm of any species as far as we know. Using indirect immunofluorescence staining, we demonstrated that CFTR was localized to the sperm equatorial segment, as previously demonstrated in human and mouse sperm [14], whereas SLC26A3 was localized over the acrosomal anterior area of the sperm head (Fig. 9, A and B). The expression of CFTR and SLC26A3 was further demonstrated by Western blot analysis, which confirmed the presence of a 170-kDa protein of CFTR, as shown previously [14], and the presence of a 75-kDa protein of SLC26A3.

#### DISCUSSION

Although it had been established that  $\text{HCO}_3^-$  has an essential role in sperm capacitation [3–7], the present study demonstrated an equally important role of  $\text{Cl}^-$  in the process by mediating the entry of  $\text{HCO}_3^-$  that is required for capacitation. To initiate capacitation,  $\text{HCO}_3^-$  has to first enter into sperm and act on an  $\text{HCO}_3^-$  sensor, soluble adenylate cyclase, which in

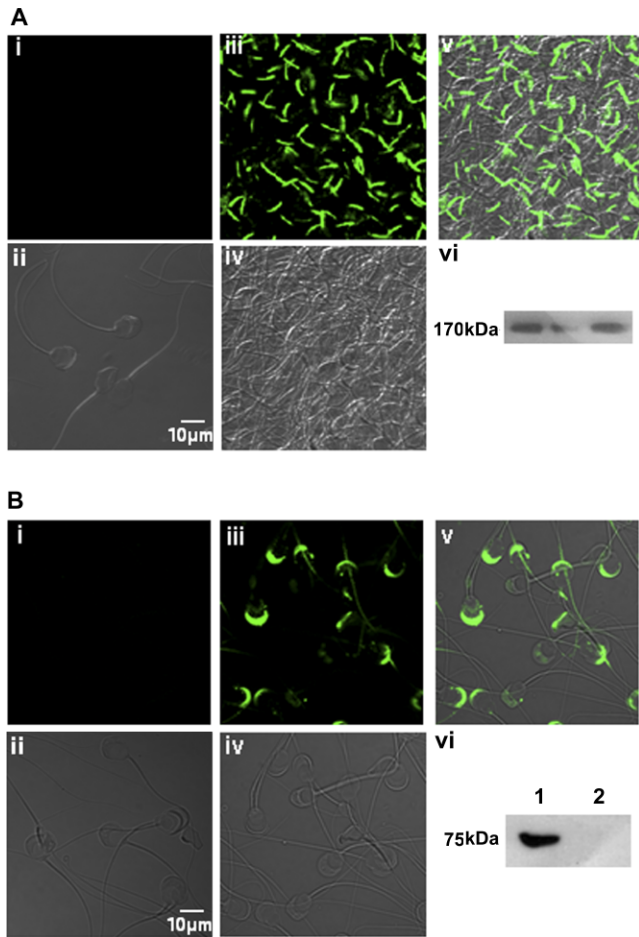

FIG. 9. Localization and expression of CFTR and SLC26A3 in guinea pig sperm. **A)** Immunostaining and Western blot analysis of CFTR in guinea pig sperm using a mouse monoclonal antibody (CF3) to CFTR (ab2784, 1:500 or 1:2000) and the secondary antibody anti-mouse IgG+IgM-FITC (ab47830, 1:1000) or anti-mouse-HRP (ab6006, 1:10000). i) Negative immunostaining control of CFTR with the mouse isotype-specific IgM. ii) Corresponding differential interference contrast image. iii) Immunofluorescence of CFTR localized to the equatorial segment region of the sperm head. iv) Corresponding differential interference contrast image of guinea pig sperm. v) Superimposed image of CFTR staining and differential interference contrast image (magnification ×630). vi) Western blot analysis of CFTR in guinea pig sperm recognized a specific band of about 170 kDa. Left to right: protein loading of 30 μg, 10 μg, and 20 μg. **B)** Immunostaining and Western blot analysis of SLC26A3 in guinea pig sperm using an antiserum against SLC26A3 and Alexa 488-conjugated goat anti-rabbit IgG (A11008, 1:1000) or SLC26A3 antibody (sc34943, 1:500) and donkey anti-goat IgG-HRP (sc2020, 1:5000). i) Negative control without primary antibody. ii) Corresponding differential interference contrast image of guinea pig spermatozoa. iii) Immunofluorescence of SLC26A3 in guinea pig spermatozoa localized in the anterior acrosome region. iv) Corresponding differential interference contrast image. v) Superimposed image of SLC26A3 staining and differential interference contrast image (magnification ×630). vi) Western blot analysis of SLC26A3 in guinea pig spermatozoa. Lane 1: SLC26A3 antibody. Lane 2: Negative control with blocking peptide (sc34942p). Bar = 10 μm.

turn triggers the signaling cascade leading to capacitation [11]. Some of the key events in this cascade such as increased pHi, cAMP production, and protein tyrosine phosphorylation, which have been previously shown to be dependent on HCO<sub>3</sub><sup>-</sup>, were also found to be dependent on Cl<sup>-</sup> in MCM in the present study. The assessment of sperm capacitation by the induced AR in the present study also supports the Cl<sup>-</sup> dependence of capacitation but not of the AR. Findings by other investigators

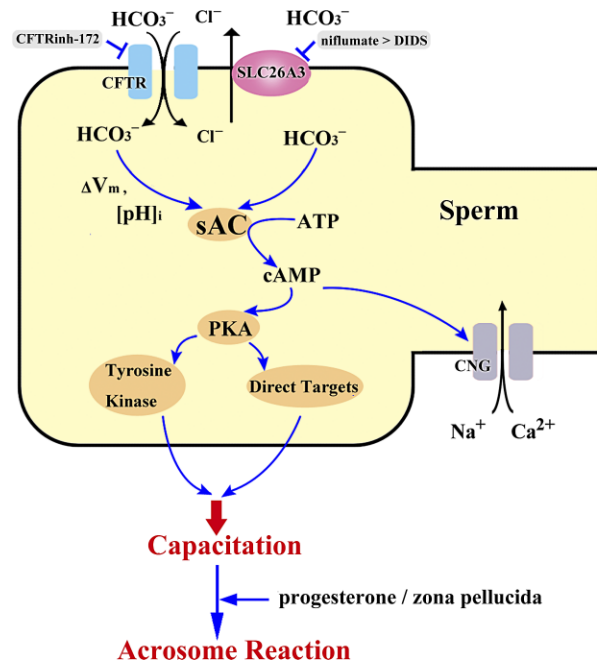

FIG. 10. Schematic illustration of involvement of SLC26A3 and CFTR in bicarbonate entry and in bicarbonate-dependent events involved in sperm capacitation. The HCO<sub>3</sub><sup>-</sup> influx is mediated by SLC26A3 with an exchange of 2Cl<sup>-</sup>/1HCO<sub>3</sub><sup>-</sup>. Apart from its reported role in conducting HCO<sub>3</sub><sup>-</sup> directly, CFTR may act as a Cl<sup>-</sup> channel to provide a recycling pathway for Cl<sup>-</sup> that is required for SLC26A3 function. The sites of action for inhibitors CFTRinh-172, niflumate, and DIDS, as well as the intracellular HCO<sub>3</sub><sup>-</sup>-dependent events, are also shown. sAC, soluble adenylyl cyclase; V<sub>m</sub>, membrane potential; PKA, protein kinase A; [pH]<sub>i</sub>, intracellular pH; CNG, cyclic nucleotide-gated channel.

have suggested a Cl<sup>-</sup> dependence of the AR process. Replacing Cl<sup>-</sup> with Br<sup>-</sup> in sperm-suspending medium was shown to result in inhibition of the zona-initiated hamster sperm AR [43]. Others reported that Cl<sup>-</sup> was required for the progesterone-initiated AR in human and porcine sperm [44]. Sperm capacitation and the AR are sequential but separate processes [22], and the other investigators did not differentiate these two processes. In the present study, Cl<sup>-</sup> depletion in the capacitating medium, but not in the AR-inducing medium, reduced acrosome-reacted sperm, indicating that Cl<sup>-</sup> is required for capacitation but not for the AR. Indeed, agonist-induced HAM, which is an event associated with sperm capacitation, was also found to be dependent on Cl<sup>-</sup> in the present study. Together with the demonstrated Cl<sup>-</sup> dependence of the capacitation-associated key events, the present results confirm that Cl<sup>-</sup> is required for capacitation.

The dependence of the capacitation-associated events on Cl<sup>-</sup>, in addition to HCO<sub>3</sub><sup>-</sup>, suggests the involvement of a Cl<sup>-</sup>/HCO<sub>3</sub><sup>-</sup> exchanger in mediating the entry of HCO<sub>3</sub><sup>-</sup>. Indeed, an inhibitor of the anion exchanger was shown to reduce the HCO<sub>3</sub><sup>-</sup>-dependent sperm capacitation assessed by the AR or by HAM in the present study. This is in agreement with previous studies [19–21] demonstrating the presence of an anion exchanger in sperm. Although it has been known for years that an exchanger for Cl<sup>-</sup> and HCO<sub>3</sub><sup>-</sup> is present in mature sperm, its exact role in sperm function and its molecular identity are unknown as far as we know. The present study not only confirms the involvement of an anion exchanger in mediating HCO<sub>3</sub><sup>-</sup> entry that is necessary for capacitation but also provides evidence indicating that the exchanger could be SLC26A3, with its expression in sperm demonstrated by

immunofluorescence staining and by Western blot analysis. The involvement of SLC26A3 is further supported by pharmacological evidence demonstrating a more potent effect of niflumate, an inhibitor more selective for SLC26A3 [45, 46], over that of DIDS, an inhibitor known to inhibit a wide spectrum of anion exchangers and cotransporters, including SLC4 member SLC4A2 (also known as AE2) [47]. Furthermore, SLC4A2 is expressed in mature mammalian sperm [48] and has been shown to be essential in spermiogenesis [49]. However, the observed more potent effect of niflumate over DIDS suggests that SLC26A3 has a more primary role in sperm capacitation. This notion was further supported by the observed inhibitory effect of its specific antibody on sperm capacitation. The specificity of the antibody against SLC26A3 has been previously reported [50, 51]; therefore, its interference with sperm capacitation observed in the present study confirms the involvement of SLC26A3 in the process. A sodium bicarbonate cotransporter has also been proposed to be involved in mouse sperm capacitation [52]. Although this mechanism may be a possible pathway for bicarbonate entry into sperm during capacitation, it cannot explain the  $\text{Cl}^-$  dependence of capacitation that was observed in the present study. Taken together, the present results suggest that SLC26A3 has a primary role in transporting bicarbonate into sperm, on which capacitation depends.

Patients with congenital chloride diarrhea with mutations in *SLC26A3* exhibit reduced fertility [42, 50], although the exact cause is unknown as far as we know. In the present study, we found that the capacity of spermatozoal penetration of oocytes was greatly reduced with decreased  $\text{Cl}^-$  concentrations. Fertilizing ability was almost abolished in  $\text{Cl}^-$ -deficient MCM compared with complete MCM, indicating that  $\text{Cl}^-$  is required for fertilization. Based on the present findings, it is highly possible that defective SLC26A3 impairs  $\text{HCO}_3^-$  entry into sperm and affects the capacitation process, leading to reduced fertilizing ability and decreasing the fertility rate, as seen in patients with congenital chloride diarrhea. Therefore, SLC26A3 could be a potential molecular target for diagnosis of male infertility.

The present results also indicate that operation of the anion exchanger requires the involvement of CFTR as a  $\text{Cl}^-$  channel to provide a recycling pathway for  $\text{Cl}^-$ . Without proper CFTR function, the entry of  $\text{HCO}_3^-$  would be disrupted due to lack of  $\text{Cl}^-$  in exchange, resulting in capacitation failure, as demonstrated in the present study using CFTR inhibitor. The importance of CFTR in the process of sperm capacitation and in male fertility has been demonstrated in our previous investigations using CF heterozygote sperm, although it was unclear whether it had a direct or an indirect role [14]. The present study not only confirms the importance of CFTR in capacitation but also demonstrates an indirect role of CFTR in transporting  $\text{HCO}_3^-$  into sperm by providing a recycling pathway for  $\text{Cl}^-$  necessitated by the anion exchanger. The parallel working of CFTR with a  $\text{Cl}^-/\text{HCO}_3^-$  exchanger has been established for pancreatic  $\text{HCO}_3^-$  secretion [17, 18]. Although localized in sperm head, CFTR and SLC26A3 are not localized to the same region, suggesting that CFTR protein in sperm does not directly interact with the anion exchanger protein as it does in the pancreas [45, 53]. Nevertheless, the two sites in the sperm head where CFTR and SLC26A3 are localized are close enough to allow ion flux exchange, and the present study provides clear evidence for a functional interaction between CFTR and the SLC26A3 exchanger that leads to sperm capacitation, which is illustrated in a working model shown in Figure 10. The demonstrated involvement of SLC26A3 in sperm capacitation, in addition to CFTR, may

shed new light on our understanding of molecular mechanisms regulating male fertility and may explain some cases of male infertility.

## ACKNOWLEDGMENTS

The authors thank Professor Emeritus D. S. Friend (Department of Pathology, School of Medicine, University of California, San Francisco) for critical reading of the manuscript and Miss Ye Chun Ruan for the artwork in Figure 10.

## REFERENCES

1. Chang MC. Fertilizing capacity of spermatozoa deposited into the fallopian tubes. *Nature* 1951; 168:697–698.
2. Austin CR. The capacitation of the mammalian sperm. *Nature* 1952; 170:326.
3. Boatman DE. Responses of gametes to the oviductal environment. *Hum Reprod* 1997; 12:133–149.
4. Liu DY, Clarke GN, Baker HW. Exposure of actin on the surface of the human sperm head during in vitro culture relates to sperm morphology, capacitation and zona binding. *Hum Reprod* 2005; 20:999–1005.
5. Visconti PE, Stewart-Savage J, Blasco A, Battaglia L, Miranda P, Kopf GS, Tezon JG. Roles of bicarbonate, cAMP, and protein tyrosine phosphorylation on capacitation and the spontaneous acrosome reaction of hamster sperm. *Biol Reprod* 1999; 61:76–84.
6. Shi QX, Roldan ER. Bicarbonate/ $\text{CO}_2$  is not required for zona pellucida- or progesterone-induced acrosomal exocytosis of mouse spermatozoa but is essential for capacitation. *Biol Reprod* 1995; 52:540–546.
7. Gadella BM, Harrison RA. The capacitating agent bicarbonate induces protein kinase A-dependent changes in phospholipid transbilayer behavior in the sperm plasma membrane. *Development* 2000; 127:2407–2420.
8. Wang XF, Zhou CX, Shi QX, Yuan YY, Yu MK, Ajonuma LC, Ho LS, Lo PS, Tsang LL, Liu Y, Lam SY, Chan LN, et al. Involvement of CFTR in uterine bicarbonate secretion and the fertilizing capacity of sperm. *Nat Cell Biol* 2003; 5:902–906.
9. Visconti PE, Bailey JL, Moore GD, Pan D, Olds-Clarke P, Kopf GS. Capacitation of mouse spermatozoa. I: correlation between the capacitation state and protein tyrosine phosphorylation. *Development* 1995; 121:1129–1137.
10. Aitken RJ, Paterson M, Fisher H, Buckingham DW, van Duin M. Redox regulation of tyrosine phosphorylation in human spermatozoa and its role in the control of human sperm function. *J Cell Sci* 1995; 108(pt 5):2017–2025.
11. Chen Y, Cann MJ, Litvin TN, Iourgenko V, Sinclair ML, Levin LR, Buck J. Soluble adenylyl cyclase as an evolutionarily conserved bicarbonate sensor. *Science* 2000; 289:625–628.
12. Poulsen JH, Fischer H, Illek B, Machen TE. Bicarbonate conductance and pH regulatory capability of cystic fibrosis transmembrane conductance regulator. *Proc Natl Acad Sci U S A* 1994; 91:5340–5344.
13. Reddy MM, Quinton PM. Selective activation of cystic fibrosis transmembrane conductance regulator  $\text{Cl}^-$  and  $\text{HCO}_3^-$  conductances. *JOP* 2001; 2:212–218.
14. Xu WM, Shi QX, Chen WY, Zhou CX, Ni Y, Rowlands DK, Yi LG, Zhu H, Ma ZG, Wang XF, Chen ZH, Zhou SC, et al. Cystic fibrosis transmembrane conductance regulator is vital to sperm fertilizing capacity and male fertility. *Proc Natl Acad Sci U S A* 2007; 104:9816–9821.
15. Hernandez-Gonzalez EO, Trevino CL, Castellano LE, de la Vega-Beltran JL, Ocampo AY, Wertheimer E, Visconti PE, Darszon A. Involvement of cystic fibrosis transmembrane conductance regulator in mouse sperm capacitation. *J Biol Chem* 2007; 282:24397–24406.
16. Hegyi P, Rakoncay Z Jr, Tiszlavicz L, Varro A, Toth A, Racz G, Varga G, Gray MA, Argent BE. SLC26 transporters and the inhibitory control of pancreatic ductal bicarbonate secretion. *Novartis Found Symp* 2006; 273:164–173.
17. Ishiguro H, Steward M, Naruse S. Cystic fibrosis transmembrane conductance regulator and SLC26 transporters in  $\text{HCO}_3^-$  secretion by pancreatic duct cells. *Sheng Li Xue Bao* 2007; 59:465–476.
18. Steward MC, Ishiguro H, Case RM. Mechanisms of bicarbonate secretion in the pancreatic duct. *Annu Rev Physiol* 2005; 67:377–409.
19. Zeng Y, Oberdorf JA, Florman HM. pH regulation in mouse sperm: identification of  $\text{Na}^+$ ,  $\text{Cl}^-$ , and  $\text{HCO}_3^-$ -dependent and arylaminobenzoate-dependent regulatory mechanisms and characterization of their roles in sperm capacitation. *Dev Biol* 1996; 173:510–520.
20. Kaupp UB, Weyand I. Cell biology: a universal bicarbonate sensor. *Science* 2000; 289:559–560.



21. Spira B, Breitbart H. The role of anion channels in the mechanism of acrosome reaction in bull spermatozoa. *Biochim Biophys Acta* 1992; 1109:65–73.
22. Yanagimachi R. Fertility of mammalian spermatozoa: its development and relativity. *Zygote* 1994; 2:371–372.
23. Roldan ER, Murase T, Shi QX. Exocytosis in spermatozoa in response to progesterone and zona pellucida. *Science* 1994; 266:1578–1581.
24. Yanagimachi R. Sperm capacitation and gamete interaction. *J Reprod Fertil Suppl* 1989; 38:27–33.
25. Kligman I, Glassner M, Storey BT, Kopf GS. Zona pellucida-mediated acrosomal exocytosis in mouse spermatozoa: characterization of an intermediate stage prior to the completion of the acrosome reaction. *Dev Biol* 1991; 145:344–355.
26. Florman HM, Corron ME, Kim TD, Babcock DF. Activation of voltage-dependent calcium channels of mammalian sperm is required for zona pellucida-induced acrosomal exocytosis. *Dev Biol* 1992; 152:304–314.
27. Huang TT Jr, Hardy D, Yanagimachi H, Teuscher C, Tung K, Wild G, Yanagimachi R. pH and protease control of acrosomal content stasis and release during the guinea pig sperm acrosome reaction. *Biol Reprod* 1985; 32:451–462.
28. Wang CN, Yuan YY, Lui HW, Shi QX. Progesterone induces acrosome reaction of human sperm and regulates transportation of some ions. *J Reprod Med* 1996; 5:155–158.
29. Yuan YY, Chen WY, Shi QX, Mao LZ, Yu SQ, Fang X, Roldan ER. Zona pellucida induces activation of phospholipase A2 during acrosomal exocytosis in guinea pig spermatozoa. *Biol Reprod* 2003; 68:904–913.
30. Chen WY, Yuan YY, Shi QX, Zhang XY. Effect of protein kinase C on guinea pig sperm acrosome reaction induced by progesterone. *Acta Pharmacol Sin* 2000; 21:787–791.
31. Barros C. Capacitation of mammalian spermatozoa. In: Countniho EM, Fuchs FF (eds.), *Physiology and Genetics of Reproduction, Part B*. New York, NY: Plenum Publication; 1974:3–24.
32. Yanagimachi R, Noda YD. Acrosome loss in fertilizing mammalian spermatozoa: a rebuttal of criticism. *J Ultrastruct Res* 1972; 39:217–221.
33. Yanagimachi R, Usui N. Calcium dependence of the acrosome reaction and activation of guinea pig spermatozoa. *Exp Cell Res* 1974; 89:161–174.
34. Chen WY, Ni Y, Pan YM, Shi QX, Yuan YY, Chen AJ, Mao LZ, Yu SQ, Roldan ER. GABA, progesterone and zona pellucida activation of PLA2 and regulation by MEK-ERK1/2 during acrosomal exocytosis in guinea pig spermatozoa. *FEBS Lett* 2005; 579:4692–4700.
35. Shi QX, Friend DS. Gossypol-induced inhibition of guinea pig sperm capacitation in vitro. *Biol Reprod* 1983; 29:1027–1032.
36. Fraire-Zamora JJ, Gonzalez-Martinez MT. Effect of intracellular pH on depolarization-evoked calcium influx in human sperm. *Am J Physiol Cell Physiol* 2004; 287:C1688–C1696.
37. Yanagimachi R, Yanagimachi H, Rogers BJ. The use of zona-free animal ova as a test-system for the assessment of the fertilizing capacity of human spermatozoa. *Biol Reprod* 1976; 15:471–476.
38. Shi QX, Yuan YY, Friend DS, Marton LJ. Effect of spermine on sperm capacitation of guinea pig in vitro. *Arch Androl* 1992; 29:33–42.
39. Suarez SS. Hyperactivated motility in sperm. *J Androl* 1996; 17:331–335.
40. Yanagimachi R. Mammalian fertilization. In: Knobil E, Neill J (eds.), *The Physiology of Reproduction*. New York, NY: Raven Press; 1994:189–317.
41. Aitken RJ, Warner PE, Reid C. Factors influencing the success of sperm-cervical mucus interaction in patients exhibiting unexplained infertility. *J Androl* 1986; 7:3–10.
42. Høglund P, Hihnalá S, Kujala M, Tiitinen A, Dunkel L, Holmberg C. Disruption of the SLC26A3-mediated anion transport is associated with male subfertility. *Fertil Steril* 2006; 85:232–235.
43. Yoshimatsu NOBU, Yanagimachi R. Effects of cations and other medium components on the zona-induced acrosome reaction of hamster spermatozoa (acrosome reaction/spermatozoa/cations/hamster). *Dev Growth Diff* 1988; 30:651–659.
44. Melendrez CS, Meizel S. Studies of porcine and human sperm suggesting a role for a sperm glycine receptor/Cl<sup>-</sup> channel in the zona pellucida-initiated acrosome reaction. *Biol Reprod* 1995; 53:676–683.
45. Ko SB, Shcheynikov N, Choi JY, Luo X, Ishibashi K, Thomas PJ, Kim JY, Kim KH, Lee MG, Naruse S, Muallem S. A molecular mechanism for aberrant CFTR-dependent HCO<sub>3</sub><sup>-</sup> transport in cystic fibrosis. *EMBO J* 2002; 21:5662–5672.
46. Chernova MN, Jiang L, Shmukler BE, Schweinfest CW, Blanco P, Freedman SD, Stewart AK, Alper SL. Acute regulation of the SLC26A3 congenital chloride diarrhoea anion exchanger (DRA) expressed in *Xenopus* oocytes. *J Physiol* 2003; 549:3–19.
47. Shmukler BE, Kurschat CE, Ackermann GE, Jiang L, Zhou Y, Barut B, Stuart-Tilley AK, Zhao J, Zou LI, Drummond IA, Vandorpe DH, Paw BH, et al. Zebrafish slc4a2/ae2 anion exchanger: cDNA cloning, mapping, functional characterization, and localization. *Am J Physiol Renal Physiol* 2005; 289:F835–F849.
48. Parkkila S, Rajaniemi H, Kellokumpu S. Polarized expression of a band 3-related protein in mammalian sperm cells. *Biol Reprod* 1993; 49:326–331.
49. Medina JF, Recalde S, Prieto J, Lecanda J, Saez E, Funk CD, Vecino P, van Roon MA, Ottenhoff R, Bosma PJ, Bakker CT, Elferink RP. Anion exchanger 2 is essential for spermiogenesis in mice. *Proc Natl Acad Sci U S A* 2003; 100:15847–15852.
50. Hihnalá S, Kujala M, Toppari J, Kere J, Holmberg C, Høglund P. Expression of SLC26A3, CFTR and NHE3 in the human male reproductive tract: role in male subfertility caused by congenital chloride diarrhoea. *Mol Hum Reprod* 2006; 12:107–111.
51. Haila S, Saarialho-Kere U, Karjalainen-Lindsberg ML, Lohi H, Airola K, Holmberg C, Hastbacka J, Kere J, Høglund P. The congenital chloride diarrhea gene is expressed in seminal vesicle, sweat gland, inflammatory colon epithelium, and in some dysplastic colon cells. *Histochem Cell Biol* 2000; 113:279–286.
52. Demarco IA, Espinosa F, Edwards J, Sosnik J, De La Vega-Beltran JL, Hockensmith JW, Kopf GS, Darszon A, Visconti PE. Involvement of a Na<sup>+</sup>/HCO<sub>3</sub><sup>-</sup> cotransporter in mouse sperm capacitation. *J Biol Chem* 2003; 278:7001–7009.
53. Ko SB, Zeng W, Dorwart MR, Luo X, Kim KH, Millen L, Goto H, Naruse S, Soyombo A, Thomas PJ, Muallem S. Gating of CFTR by the STAS domain of SLC26 transporters. *Nat Cell Biol* 2004; 6:343–350.
